# Supplementary material
Source: publisher figshare collection journal article supplement (https://gsapubs.figshare.com/articles/dataset/_/20425626)
Supplement: Supplementary file 1 [file 2]

Weiliang, Kong., Zhaochong, Zhang., Dongyang, Zhang., Changhong, Wang., M., Santosh., Bingxiang, Liu., and Bowen, Wei., 2022, New insights into deep carbon recycling and formation of nepheline-bearing alkaline rocks from Sr-Nd-Mg isotope compositions: GSA Bulletin, <https://doi.org/10.1130/B36555.1>.

## Supplemental Material

**Figure S1.** Field photographs and photomicrographs of the nepheline syenite (plane-polarized light).

**Figure S2.** Harker diagram of major elements from clinopyroxene in nepheline syenite and nephelinite.

**Figure S3.** Primitive mantle-normalized trace element patterns and chondrite-normalized rare earth element patterns of the clinopyroxenes in Wajilitag nepheline syenite and nephelinite.

**Figure S4.** LOI versus Na<sub>2</sub>O, Ba, Sr and Zr diagrams.

**Figure S5.** Rayleigh fractionation model showing the  $\delta^{26}\text{Mg}$  evolution as fractional crystallization of ilmenite and spinel.

**Table S1.** Major element analyses of the clinopyroxene in the Wajilitag nepheline syenite, Tarim LIP, NW China.

**Table S2.** Trace element analyses of the clinopyroxene in the Wajilitag nepheline syenite and nephelinite, Tarim LIP, NW China.

**Table S3.** Sr isotopic compositions of the clinopyroxene in the Wajilitag nepheline syenite and nephelinite, Tarim LIP, NW China.

**Table S4.** Major element analyses of the alkali feldspar in the Wajilitag nepheline syenite, TLIP, Tarim LIP, NW China.

**Table S5.** Major element analyses of the nepheline in the Wajilitag nepheline syenite, Tarim LIP, NW China.

**Table S6.** Major element analyses of the sodalite in the Wajilitag nepheline syenite, Tarim LIP, NW China.

**Table S7.** Major element analyses of the titanite in the Wajilitag nepheline syenite, Tarim LIP, NW China.

**Table S8.** Major element analyses of the apatite in the Wajilitag nepheline syenite, Tarim LIP, NW China.

**Table S9.** Major (wt%) and trace (ppm) elements of the Wajilitag nepheline syenite, Tarim LIP, NW China.

**Table S10.** Zircon U–Pb ages of the Wajilitag nepheline syenite, Tarim LIP, NW China.

**Table S11.** Sr-Nd isotopic compositions of the Wajilitag nepheline syenite, Tarim LIP, NW China.

**Table S12.** Mg isotopic compositions of the Wajilitag nepheline syenite, Tarim LIP, NW China.

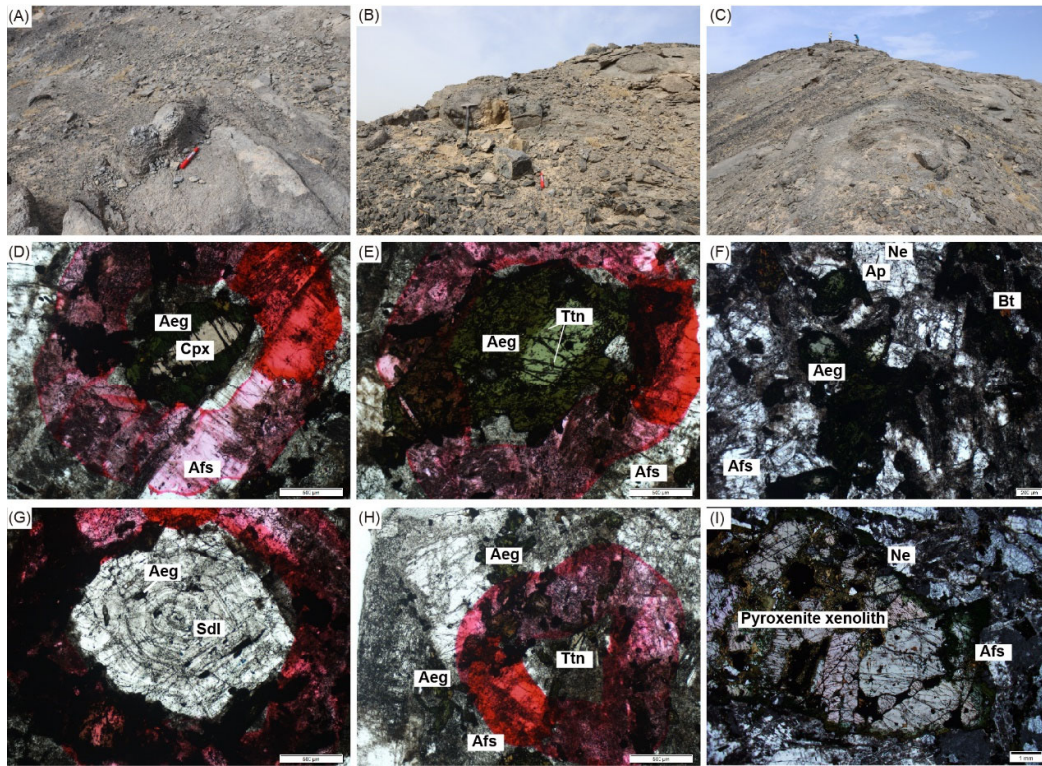

Figure S1. Field photographs (A, B and C) and photomicrographs (D to I) of the nepheline syenite (plane-polarized light). (D) Clinopyroxene showing the core is diopside; (E) The titanite grains enclosed in the clinopyroxene; (F) The potassium feldspar, aegirine-augite, apatite and biotite in the nepheline syenite, and the apatite enclosed in the nepheline; (G) Aegirine-augite grains enclosed in the sodalite; (H) The titanite in the nepheline syenite; (I) The pyroxenite xenolith in the nepheline syenite.

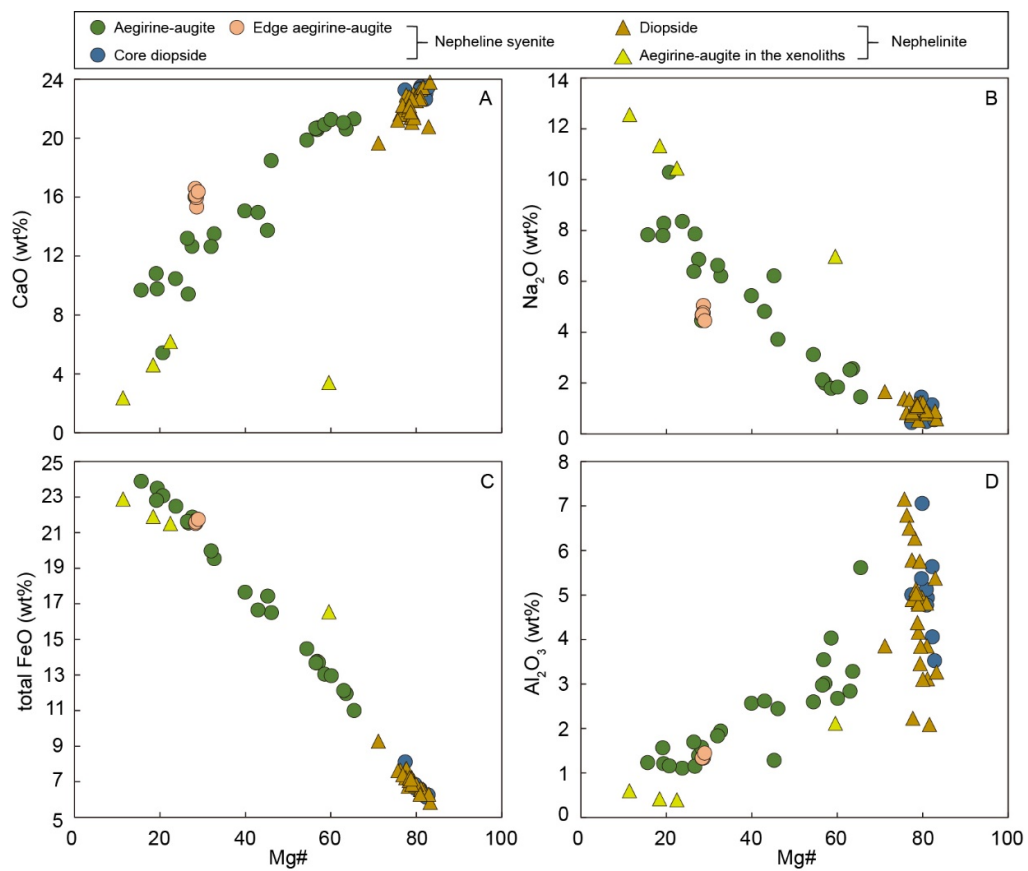

Figure S2. Harker diagram of major elements from clinopyroxene in nepheline syenite and nephelinite.

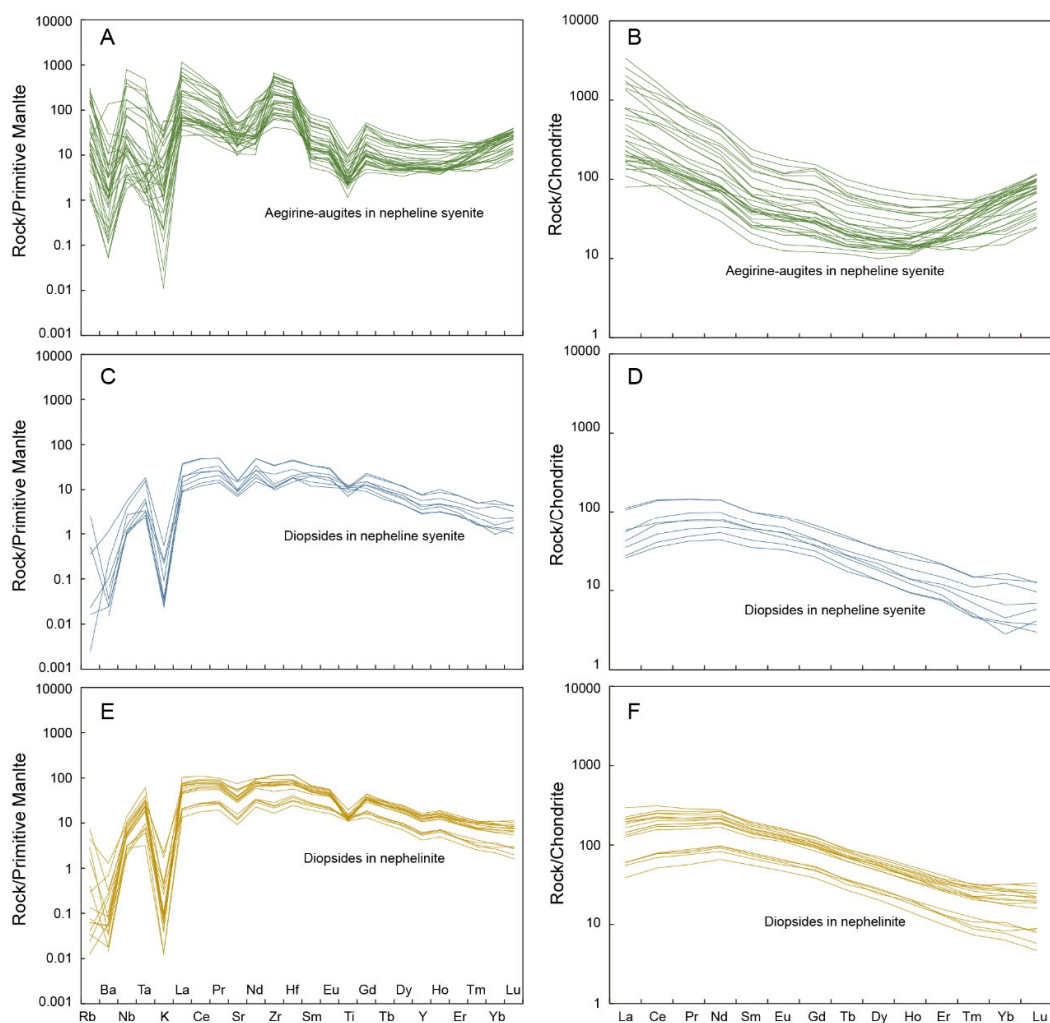

Figure S3. Primitive mantle-normalized trace element patterns (A, C and E) and chondrite-normalized rare earth element patterns (B, D and F) of the clinopyroxenes in Wajilitag nepheline syenite and nephelinite. Normalized values are after [Sun and McDonough \(1989\)](#).

#### REFERENCE CITED

Sun, S.S., McDonough, W.F., 1989, Chemical and isotopic systematics of oceanic basalts: implications for mantle composition and processes: Geological Society London Special Publications, v. 42, p. 313–345, <https://doi.org/10.1144/GSL.SP.1989.042.01.19>.

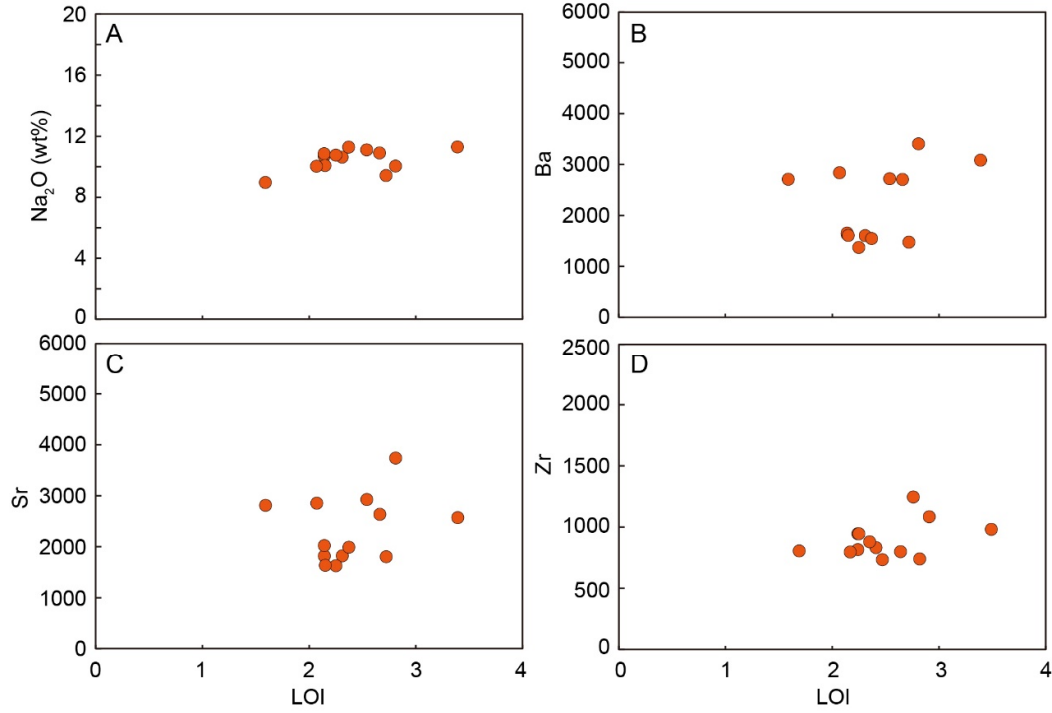

Figure S4. LOI versus Na<sub>2</sub>O, Ba, Sr and Zr diagrams

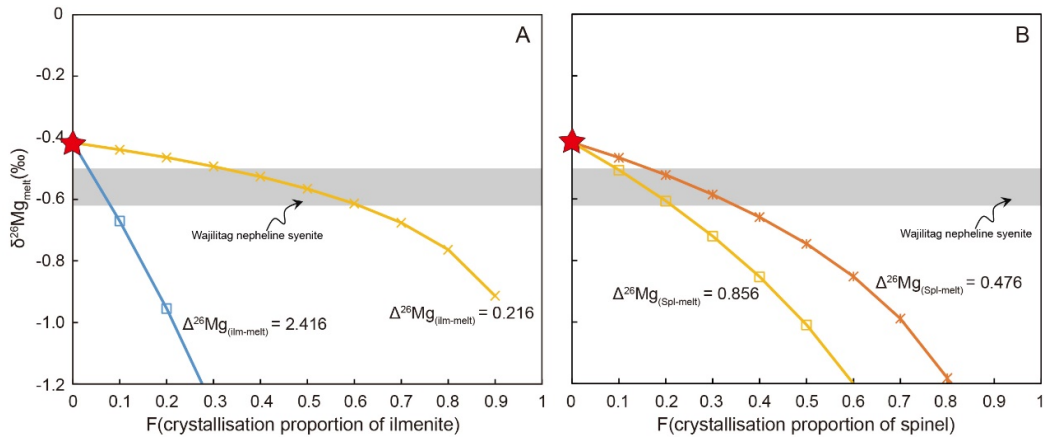

Figure S5. Rayleigh fractionation model showing the  $\delta^{26}\text{Mg}$  evolution as fractional crystallization of ilmenite (A) and spinel (B). Modelling starts from the Wajilitag nephelinite (red star), where  $\delta^{26}\text{Mg} = -0.416\text{‰}$  (the average  $\delta^{26}\text{Mg}$  value of nephelinites, n=10, [Cheng et al., 2015](#)). The gray bar represents the range of  $\delta^{26}\text{Mg}$  values of the Wajilitag nepheline syenite of NW China (this study).

## **REFERENCE CITED**

Cheng, Z.G., Zhang, Z.C., Hou, T., Santosh, M., Zhang, D.Y., and, Ke S., 2015,  
Petrogenesis of nephelinites from the Tarim Large Igneous Province, NW China:  
Implications for mantle source characteristics and plume–lithosphere interaction:  
Lithos, v. 220–223, p. 164–178, <https://doi.org/10.1016/j.lithos.2015.02.002>.
